# Supplementary material
Source: publisher figshare collection journal article supplement (https://acs.figshare.com/ndownloader/files/4885276)
Supplement: Supplementary file 1 [file 4885276]

Compound_ID	SMILES	Anti-proliferation rates (%) at 40 ?M (A549)	Anti-proliferation rates (%) at 2 ?M (A549)	Anti-proliferation rates (%) at 40 ?M (MCF-7)	Anti-proliferation rates (%) at 2 ?M (MCF-7)	IC50 for A549 (?M)	IC50 for MCF-7 (?M)	Binding affinity to PDK1 (?M)	-logPapp b	ClogP
5	O=C(Nc1ccc(Cl)cn1)C(Cl)Cl	17.93	NI a	16.62	NI				4.94	2.65
6	O=C(Nc1ncc(C(F)(F)F)cc1Cl)C(Cl)Cl	8.06	NI	13.64	NI				5.03	2.81
7	O=C(Nc1cccc(Br)n1)C(Cl)Cl	8.82	NI	15.85	NI				4.9	2.8
8	Cc1cc(NC(=O)C(Cl)Cl)cnc1Cl	6.43	NI	22.68	NI				4.92	3.15
9	O=C(Nc1cccc(Cl)n1)C(Cl)Cl	16.94	NI	24.17	NI				4.9	2.65
10	O=C(Nc1cnccc1Cl)C(Cl)Cl	10.05	NI	20.76	NI				5.06	1.8
11	O=C(Nc1ccc(Cl)nc1)C(Cl)Cl	5.21	NI	21.51	NI				5.15	2.65
12	O=C(Nc1cccnc1Cl)C(Cl)Cl	4.07	NI	11.19	NI				4.87	1.8
13	Cc1cc(C)nc(NC(=O)C(Cl)Cl)c1	0.63	NI	12.37	NI				4.89	2.82
14	O=C(Nc1cc(Cl)ccn1)C(Cl)Cl	12.38	NI	11.81	NI				4.88	2.64
15	Cc1nc(Cl)c(NC(=O)C(Cl)Cl)c(Cl)n1	80.67	6.09	67.47	NI	26.02	22.89		5.22	1.43
17	Cc1cc(C)nc(NC(=O)C(Cl)Cl)n1	8.23	NI	2.63	NI				5.15	1.55
19	Cc1cc(Cl)nc(NC(=O)C(Cl)Cl)n1	5.47	NI	8.89	NI				5.27	1.8
22	COc1cc(Cl)nc(NC(=O)C(Cl)Cl)n1	12.43	8.35	6.16	NI				5.06	2.24
23	O=C(Nc1cnc(Cl)nc1)C(Cl)Cl	10.08	5.81	10.13	NI				5.37	1.91
24	CSc1nc(Cl)cc(NC(=O)C(Cl)Cl)n1	5.31	NI	10.49	NI				5.06	3.11
26	O=C(Nc1c(Cl)ncnc1Cl)C(Cl)Cl	73.89	8.45	65.15	NI	28.42	19.34		5.45	0.93
27	COc2cc1nc(Cl)nc(NC(=O)C(Cl)Cl)c1cc2OC	36.66	8.19	54.47	NI				5.45	3.69
28	Cc1cc(Cl)ncc1NC(=O)C(Cl)Cl	12.25	NI	15.8	NI				5.03	2.5
29	Cc1ccc(NC(=O)C(Cl)Cl)c(Cl)n1	15.26	NI	13.03	NI				4.95	2.3
30	Cc1ncc(NC(=O)C(Cl)Cl)cc1Cl	37.09	NI	23.5	NI				5.39	3.15
32	O=C(NC2CCN(Cc1ccccc1)CC2)C(Cl)Cl	3.55	NI	5	NI				4.97	2.09
34	O=C(Nc1ccccc1c2ccccc2)C(Cl)Cl	11.58	NI	NI	NI				4.72	3.35
35	O=C(Nc2nc1cc(Cl)ccc1o2)C(Cl)Cl	5.63	NI	NI	NI				5.7	3.39
36	O=C(Nc2nc1ccc(Cl)cc1s2)C(Cl)Cl	8.72	NI	NI	NI				5.03	4.04
38	O=C(Nc1ccc(Cl)cc1C(F)(F)F)C(Cl)Cl	11.21	NI	5.87	NI				NT	3.17
39	O=C(Nc1ccc(Cl)c(C(F)(F)F)c1)C(Cl)Cl	97.81	NI	94.05	NI	7.46	3.12	40.8	5.04	4.42
40	O=C(Nc1ccc(C(F)(F)F)cc1Cl)C(Cl)Cl	1.09	NI	23.27	NI				NT	3.77
41	O=C(Nc1cc(C(F)(F)F)ccc1Cl)C(Cl)Cl	34.58	NI	32.97	NI				NT	3.77
43	O=C(Nc1nc(F)cc(F)n1)C(Cl)Cl	1.45	NI	26.05	NI				5.41	0.89
44	O=C(Nc1ncnc(Cl)c1F)C(Cl)Cl	5.32	NI	20.87	NI				5.58	1.46
45	O=C(Nc1ncc(F)cn1)C(Cl)Cl	1.23	NI	21.38	NI				5.53	4.6
46	O=C(Nc1cc(S(=O)(=O)F)ccc1O)C(Cl)Cl	1.22	NI	26.2	NI				5.24	3.16
47	O=C(Nc2cc(S(=O)(=O)N1CCNCC1)ccc2O)C(Cl)Cl	0.45	NI	26.22	NI				5.44	1.85
50	O=C(Nc1ccc(F)cc1C(F)(F)F)C(Cl)Cl	NI	NI	NT c	NT				NT	2.6
52	O=C(Nc1ccc(NC(=O)C(Cl)Cl)c(C(F)(F)F)c1)C(Cl)Cl	33.2	NI	NT	NT	82.5	NT		NT	2.85
53	O=C(Cc1cccc(C(F)(F)F)c1CC(=O)C(Cl)Cl)C(Cl)Cl	12.1	NI	NT	NT				NT	2.64
a NI = no inhibition; b The permeability data (-logPapp) were determined by using the PAMPA assay (Pion Inc, USA); c NT = not test
